# Supplementary material
Source: PubMed Central journal article supplement (PMC2924877)
Supplement: NIHMS187489-supplement.pdf [file NIHMS187489-supplement.pdf]

# Postsynthetic Modification: A Versatile Approach Towards Multifunctional Metal-Organic Frameworks

*Sergio J. Garibay, Zhenqiang Wang, Kristine K. Tanabe, and Seth M. Cohen\**

Department of Chemistry and Biochemistry, University of California, San Diego, 9500 Gilman Drive,  
La Jolla, California 92093-0358

scohen@ucsd.edu

## **SUPPORTING INFORMATION**

\* To whom correspondence should be addressed. E-mail: scohen@ucsd.edu. Telephone: (858) 822-5596. Fax: (858) 822-5598.

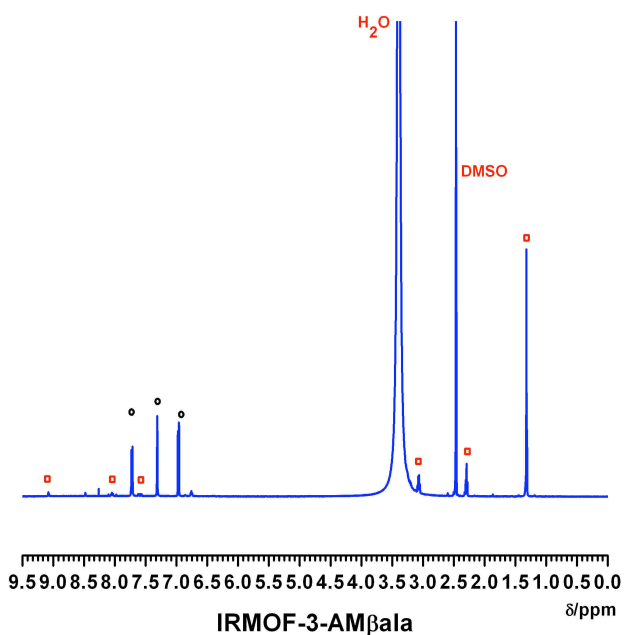

**Figure S1.**  $^1\text{H}$  NMR spectra of digested IRMOF-3 modified with Boc- $\beta$ -alanine anhydride for 2 days.  $\text{NH}_2$ -BDC resonances are denoted by black circles and RCONH-BDC resonances by red squares.

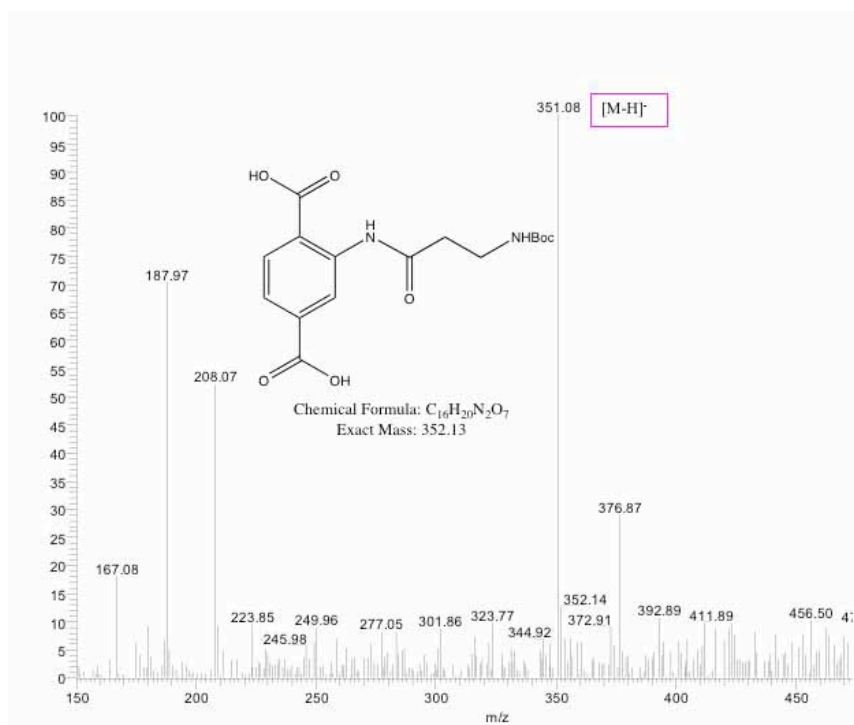

**Figure S2.** ESI-MS (negative ion mode) of the digested IRMOF-3-AM $\beta$ ala.

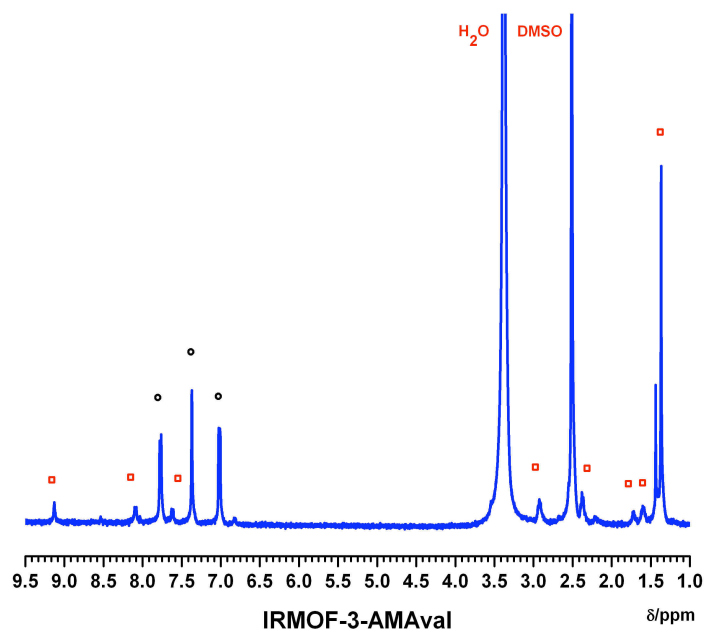

**Figure S3.**  $^1\text{H}$  NMR spectra of digested IRMOF-3 modified with Boc-aminovaleric anhydride for 2 days.  $\text{NH}_2\text{-BDC}$  resonances are denoted by black circles and  $\text{RCONH-BDC}$  resonances by red squares.

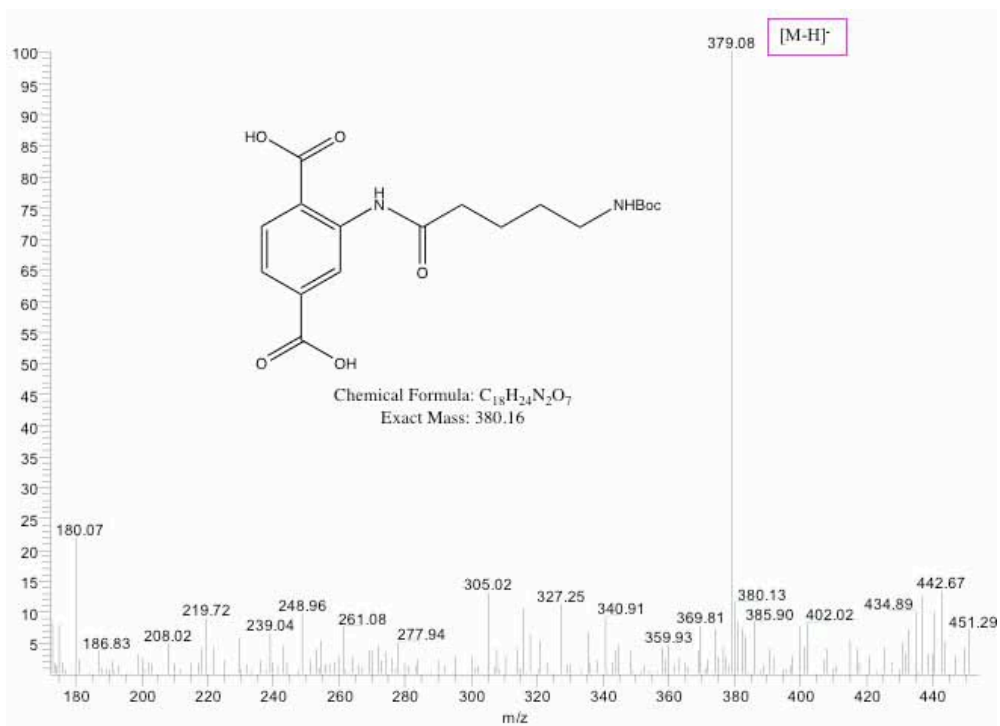

**Figure S4.** ESI-MS (negative ion mode) of the digested IRMOF-3-AMAv.

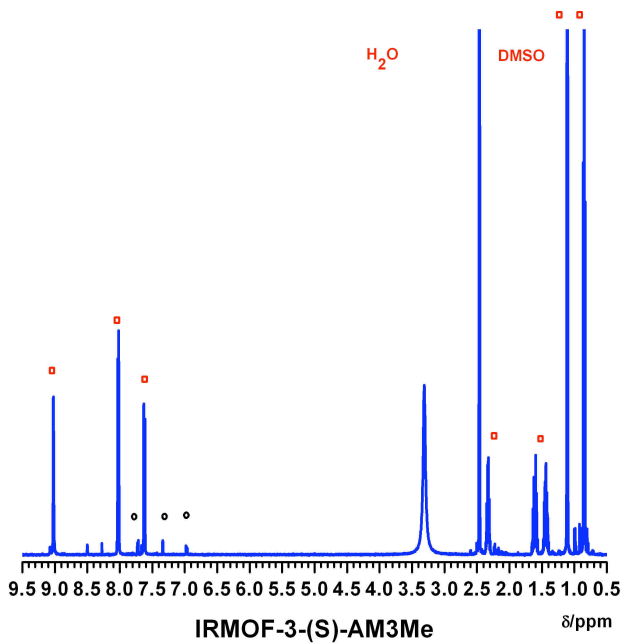

**Figure S5.**  $^1\text{H}$  NMR spectra of digested IRMOF-3 modified with (*S*)-(+)-2-methyl butyric anhydride for 5 days.  $\text{NH}_2$ -BDC resonances are denoted by black circles and RCONH-BDC resonances by red squares.

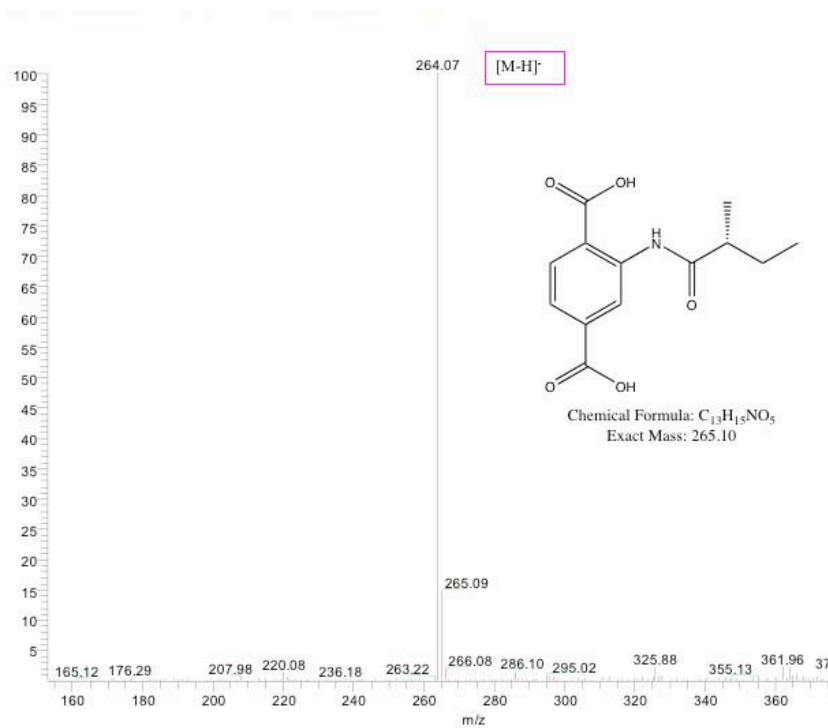

**Figure S6.** ESI-MS (negative ion mode) of the digested IRMOF-3-(*S*)-AM3Me.

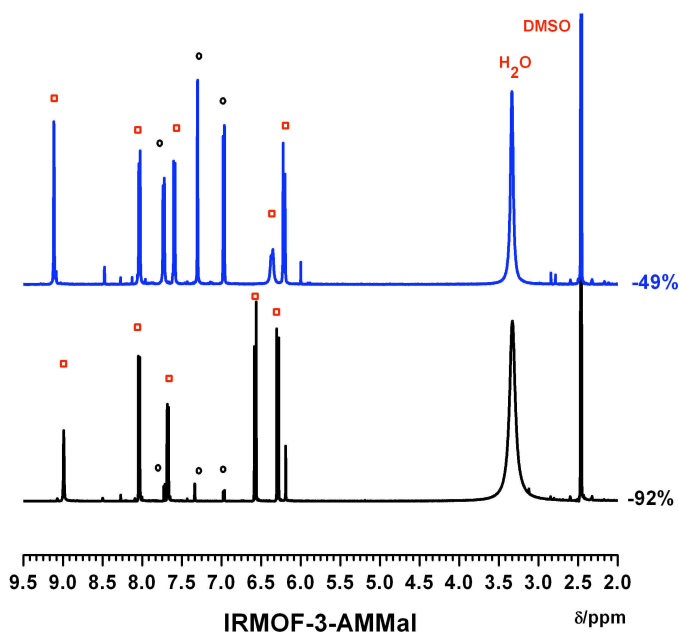

**Figure S7.**  $^1\text{H}$  NMR spectra of digested IRMOF-3 modified with maleic anhydride for 5 days (bottom) and 1 day (top).  $\text{NH}_2\text{-BDC}$  resonances are denoted by black circles and  $\text{RCONH-BDC}$  resonances by red squares.

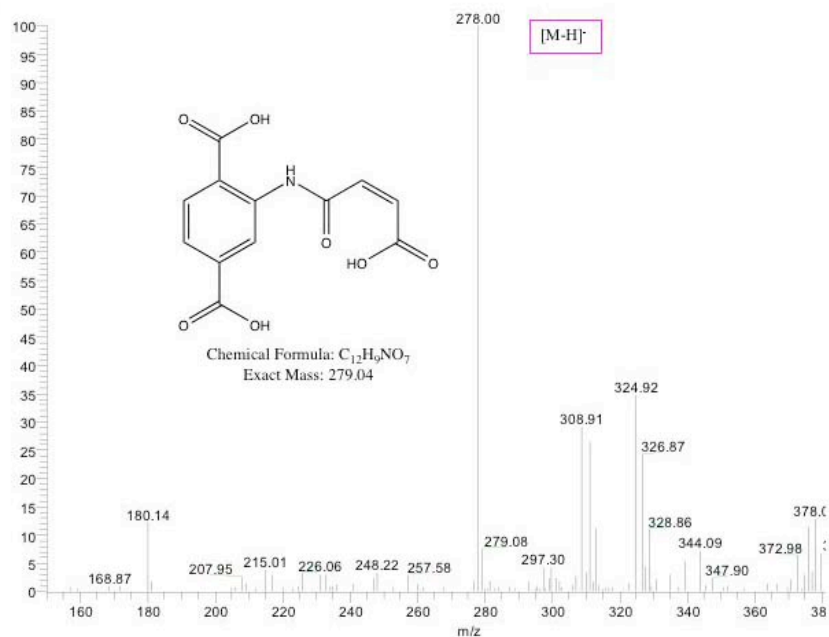

**Figure S8.** ESI-MS (negative ion mode) of the digested IRMOF-3-AMMal.

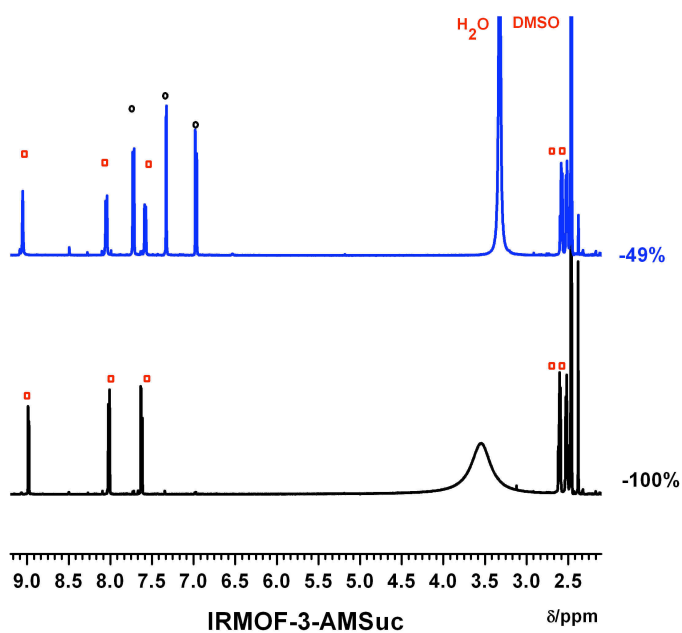

**Figure S9.**  $^1\text{H}$  NMR spectra of digested IRMOF-3 modified with succinic anhydride for 5 days (bottom) and 1 day (top).  $\text{NH}_2\text{-BDC}$  resonances are denoted by black circles and  $\text{RCO-NH-BDC}$  resonances by red squares.

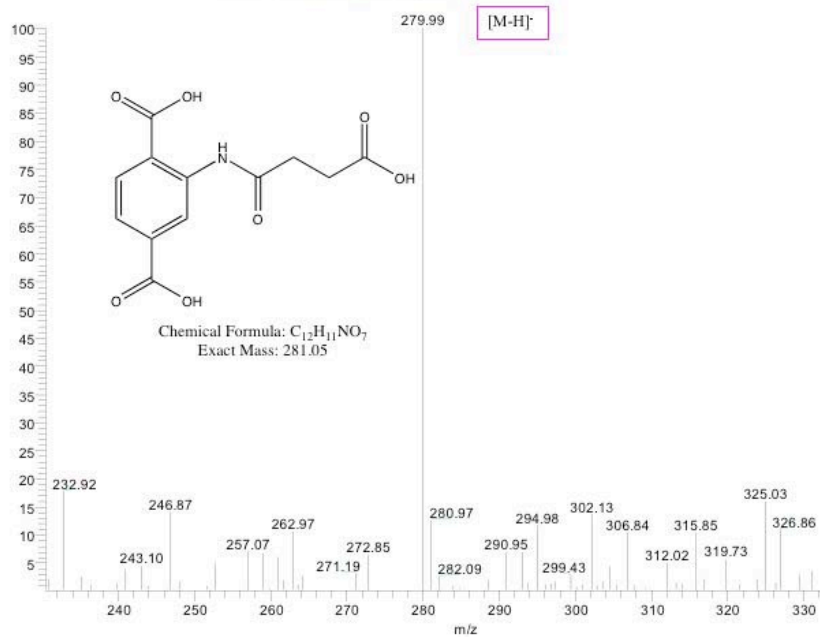

**Figure S10.** ESI-MS (negative ion mode) of the digested IRMOF-3-AMSuc.

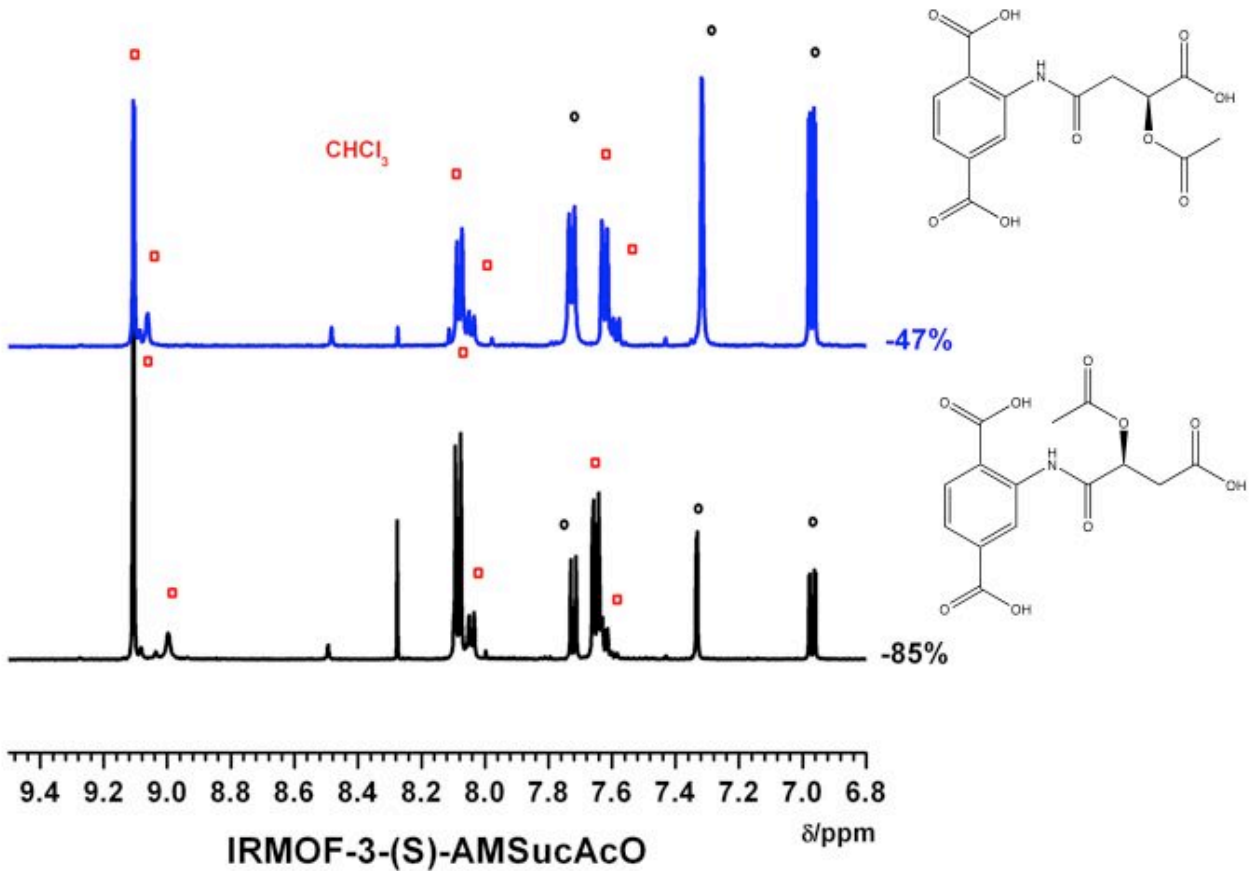

**Figure S11.** <sup>1</sup>H NMR spectra of digested IRMOF-3 modified with (*S*)-(-)-2-acetoxysuccinic anhydride for 1 days (top) and 5 days (bottom), respectively. The two amide products that can form are shown at the right (note that each spectra is a mixture of the two isomers). NH<sub>2</sub>-BDC resonances are denoted by black circles and RCONH-BDC resonances by red squares.

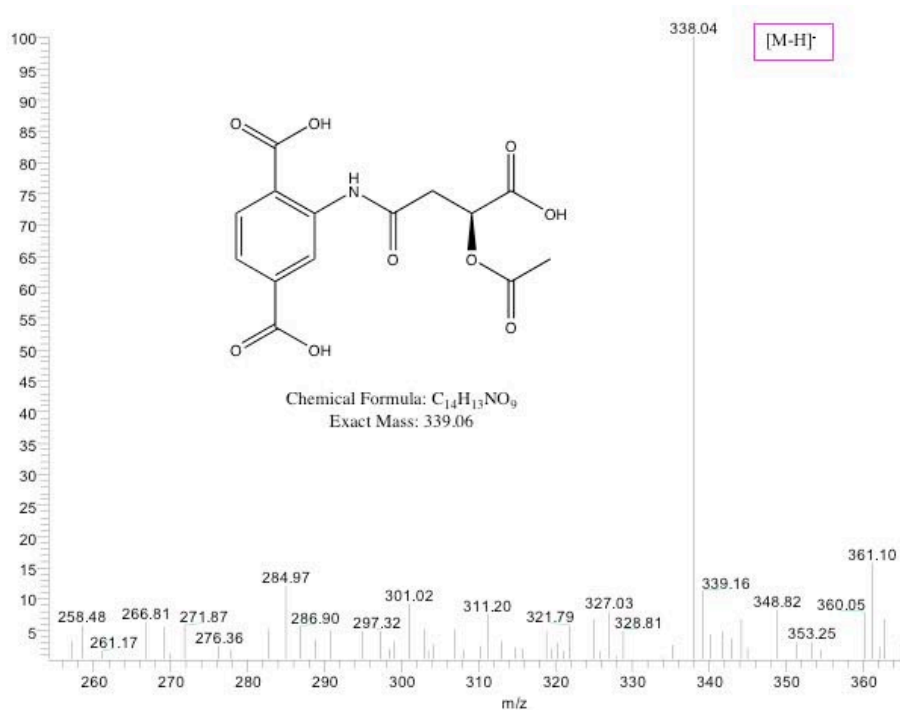

**Figure S12.** ESI-MS (negative ion mode) of the digested IRMOF-3-(S)-AMSucAcO.

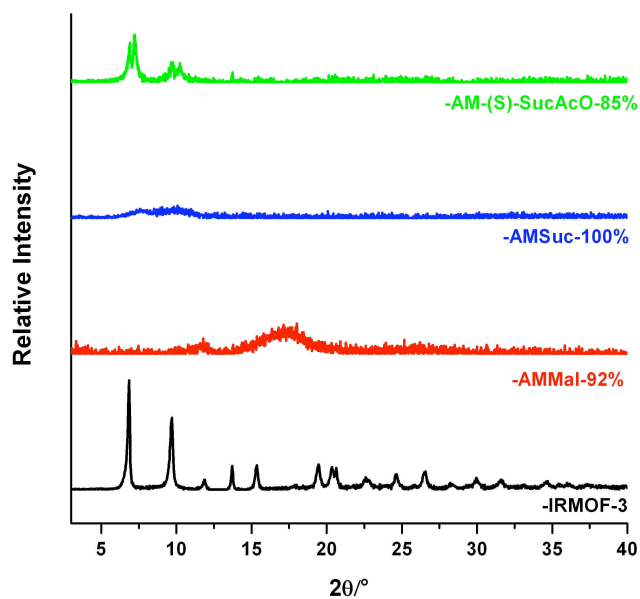

**Figure S13.** Powder X-ray diffraction (PXRD) patterns of cyclic anhydride modified IRMOF-3 samples at their respective conversions. Modified IRMOF-3 samples were soaked and exchanged with fresh  $CHCl_3$  for 3 days. After decanting off the solvent, the samples were left drying in air for 10 min prior to PXRD analysis.



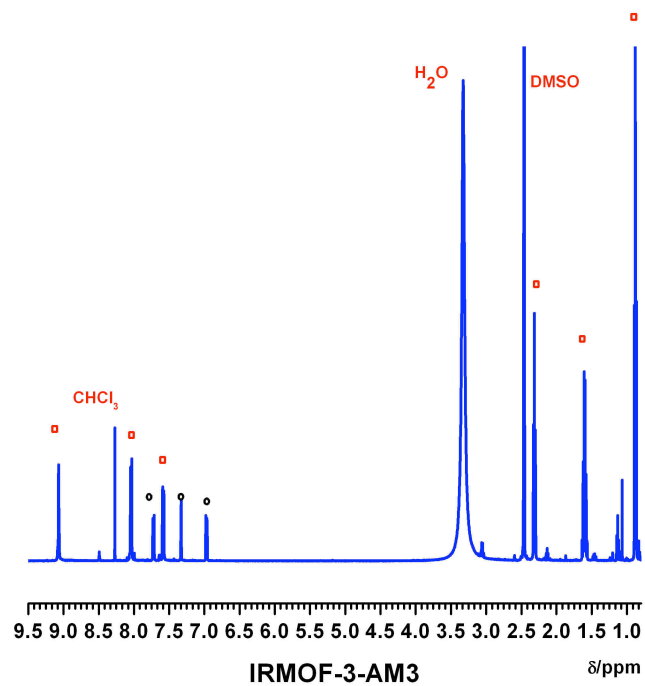

**Figure S14.**  $^1\text{H}$  NMR spectra of digested IRMOF-3 modified with pivalic butyric anhydride for 3 days.  $\text{NH}_2$ -BDC resonances are denoted by black circles and RCONH-BDC resonances by red squares.

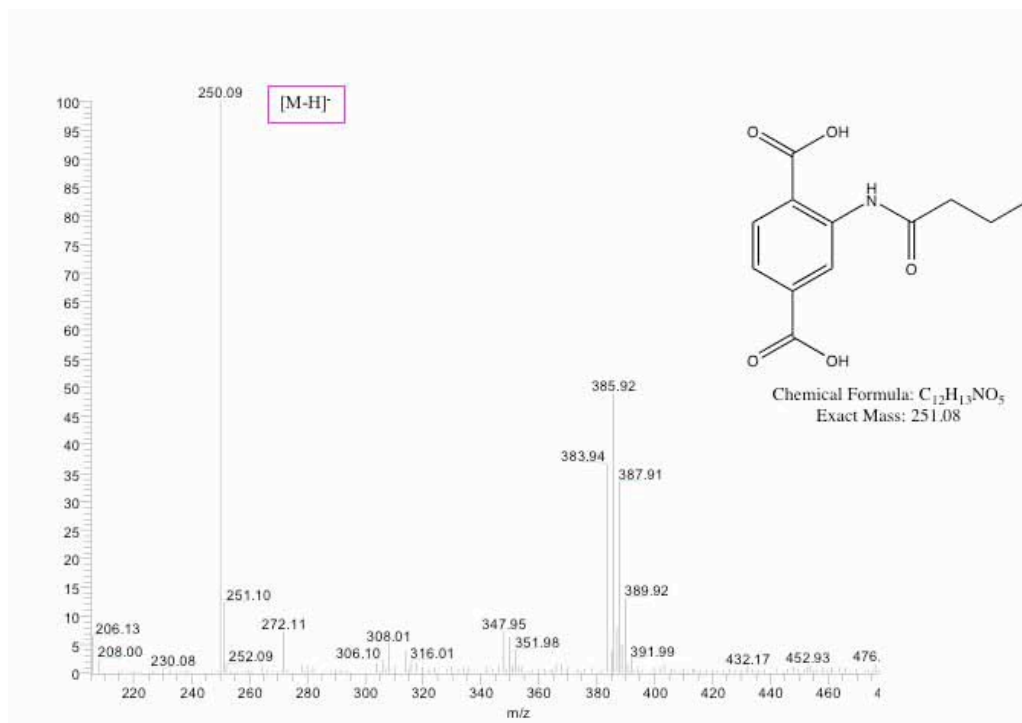

**Figure S15.** ESI-MS (negative ion mode) of the digested IRMOF-3-AM3.

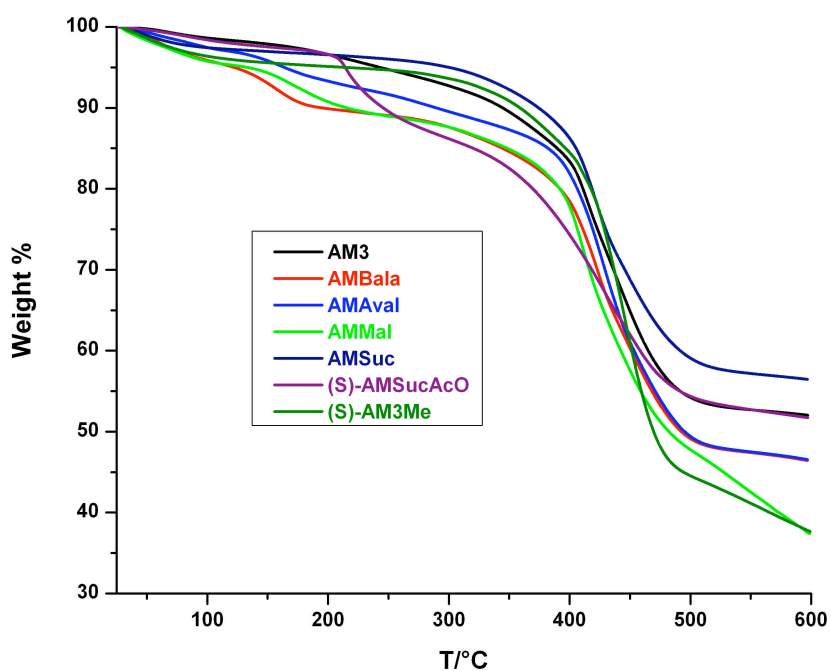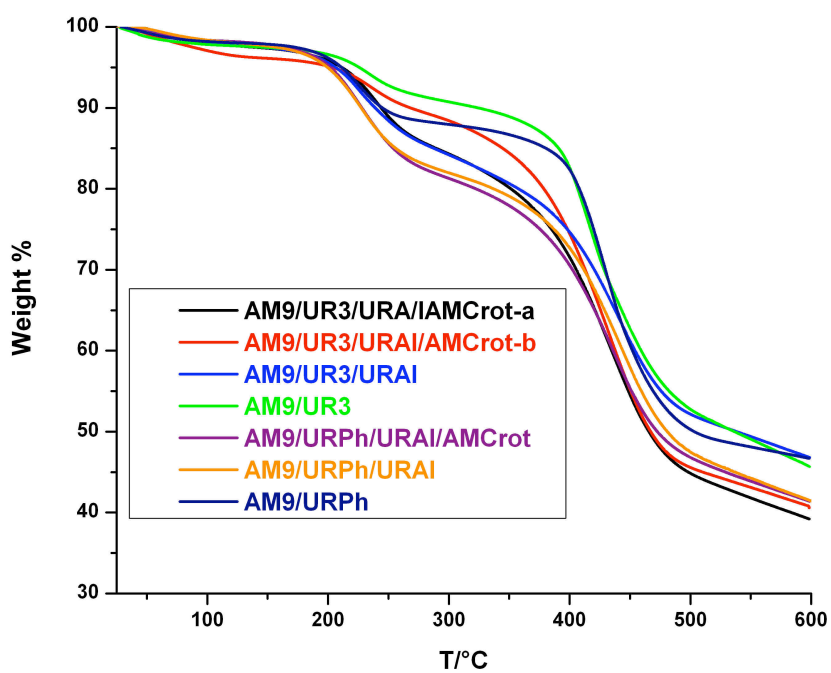

**Figure S16.** Thermogravimetric analysis (TGA) of modified IRMOF-3 samples. All samples were dried under vacuum for 8 h. Modified IRMOF-3 (10-20 mg) was heated at a scan rate of 5 °C/min from 25 to 600 °C.

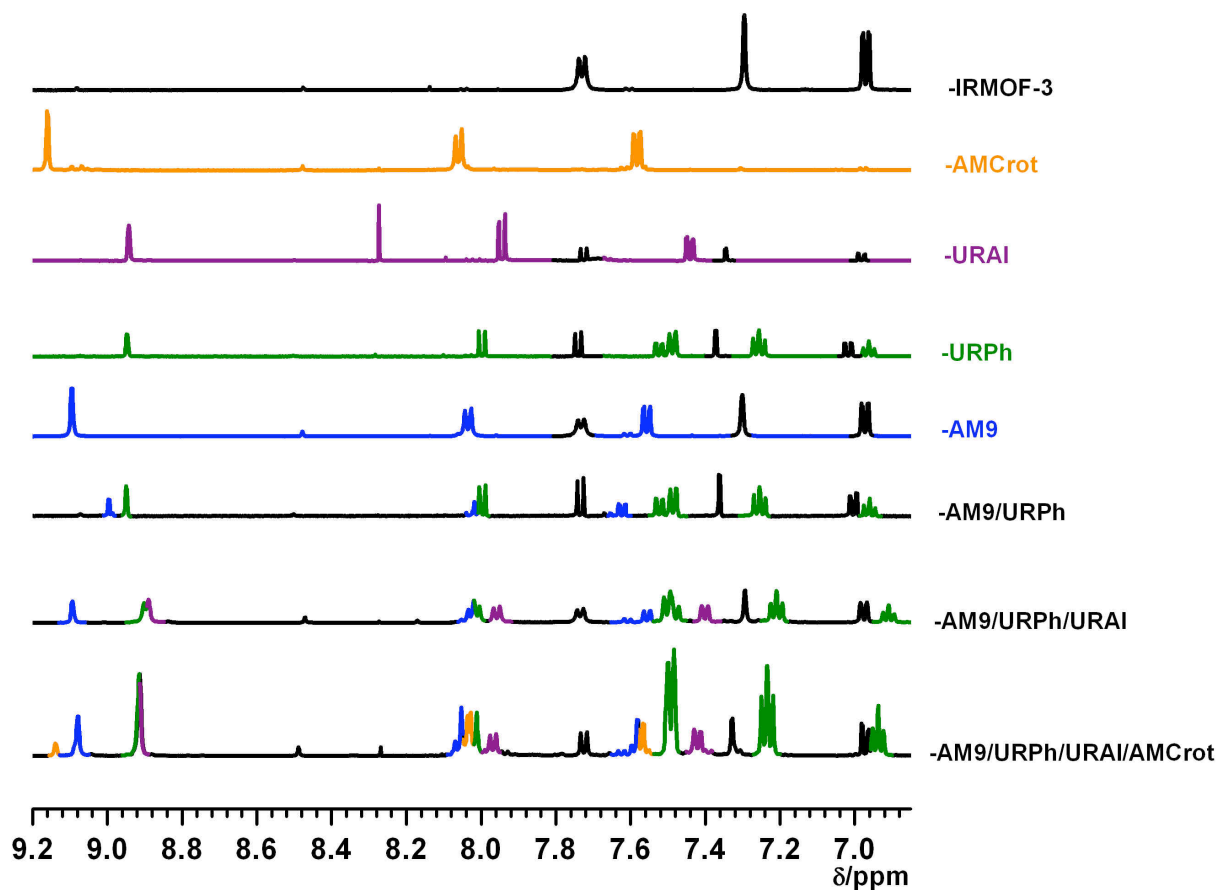

**Figure S17.** <sup>1</sup>H NMR spectra of multiple modified IRMOF-3 samples, IRMOF-3 samples modified with decanoic anhydride (blue, 51% conversion), phenyl isocyanate (green, 53% conversion), allyl isocyanate (purple, 75% conversion), crotonic anhydride (orange, 100% conversion), and unmodified IRMOF-3 (black) digested in DCI/D<sub>2</sub>O and DMSO-*d*<sub>6</sub>. Resonances in the spectra for IRMOF-3-AM9/URPh, IRMOF-3-AM9/URPh/URAI, and IRMOF-3-AM9/URPh/URAI/AMCrot-*a* are color coded corresponding to the top five spectra. IRMOF-3 resonances appear black in all spectra shown..

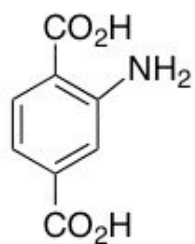

**NH2-BDC (MW=181)**

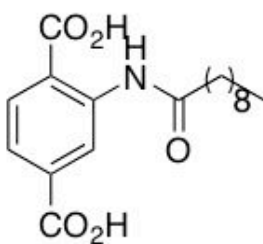

**AM9 (MW=335)**

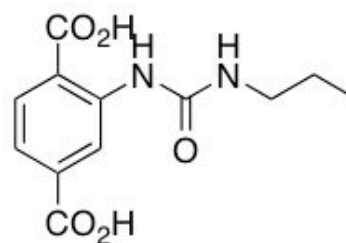

**UR3 (MW=266)**

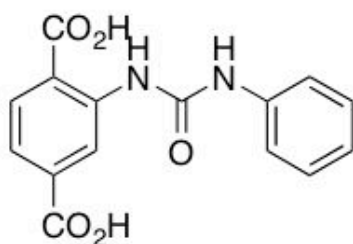

**URPh (MW=300)**

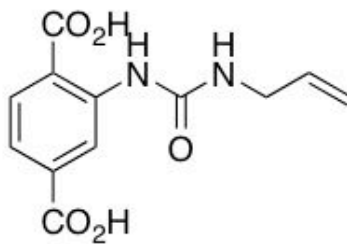

**URAI (MW=264)**

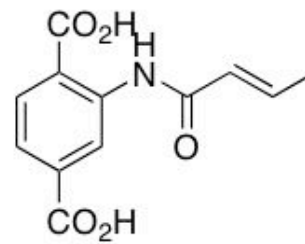

**AMCrot (MW=249)**

**Figure S18.** Expected molecular weight of unmodified, amide or urea products.

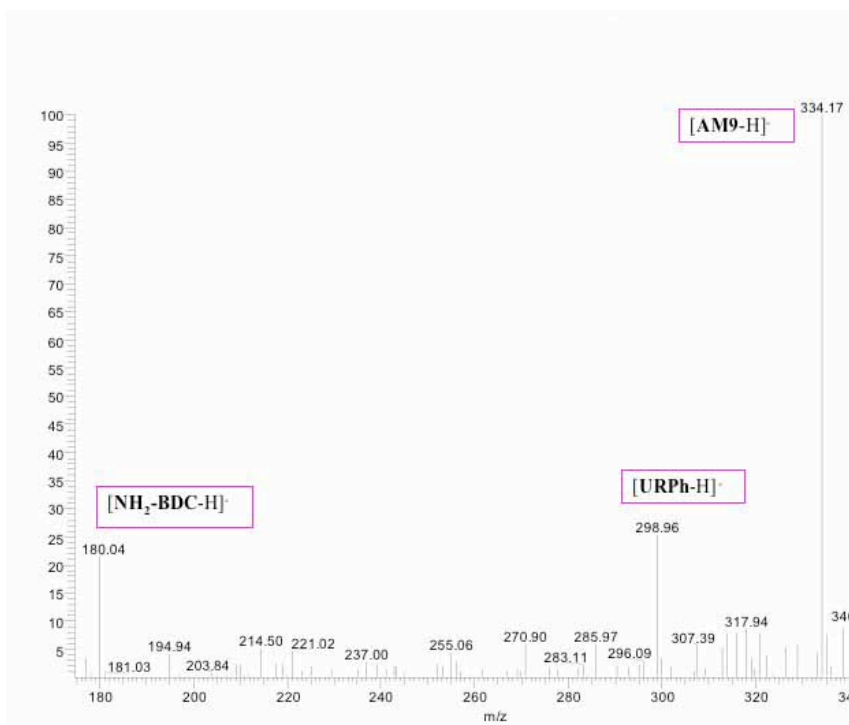

**Figure S19** ESI-MS (negative mode) of a digested IRMOF-3-AM9/URPh single crystal.

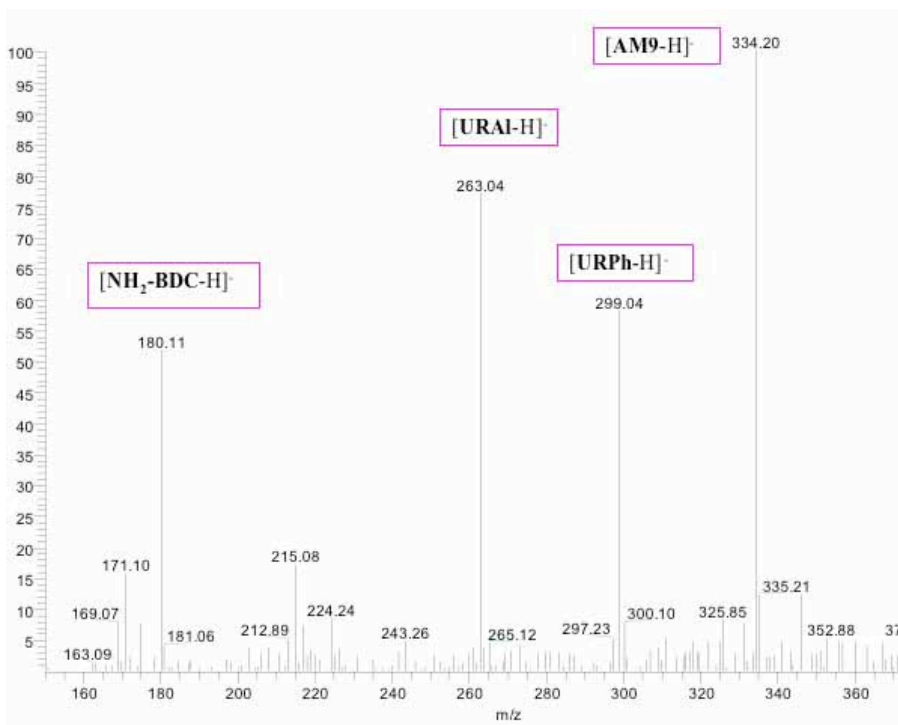

**Figure S20.** ESI-MS (negative mode) of a digested IRMOF-3-AM9/URPh/URAl single crystal.

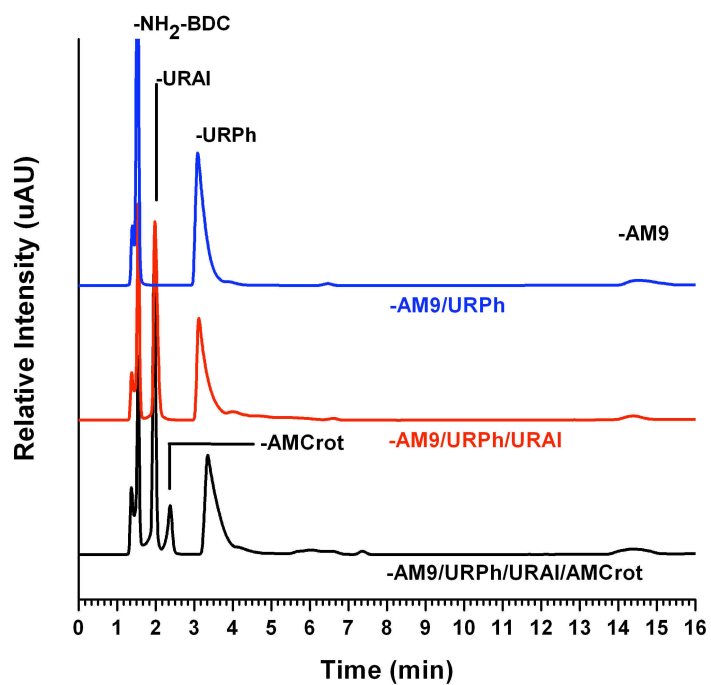

**Figure S21.** LC-UV/MS trace of IRMOF-3-AM9/URPh (blue), IRMOF-3-AM9/URPh/URAI (red), IRMOF-3-AM9/URPh/URAI/AMCrot-*a* (black).

**Table S1.** BET surface areas (m<sup>2</sup>/g) of postsynthetic modified IRMOF-3, with varied percent conversions of cyclic anhydrides as determined by <sup>1</sup>H NMR. The results of two independent experiments are shown.

| IRMOF-3- | AMMal (92%) | AMMal (49%) | AMSuc (99%) | AMSuc (49%) | (S)-AMSucAcO (47%) |
|----------|-------------|-------------|-------------|-------------|--------------------|
| Trial 1  | 29          | 2025        | 1.11        | 1558        | 1217               |
| Trial 2  | 3           | 1785        | 3.17        | 1212        | 1021               |

**Table S2.** BET surface areas (m<sup>2</sup>/g) of IRMOF-3 modified with multiple reagents. The results of two independent experiments are shown.

| IRMOF-3- | AM9/UR3 | AM9/URPh | AM9/UR3/UR<br>Al/AMCrot- <i>a</i> | AM9/UR3/UR<br>Al/AMCrot- <i>b</i> | AM9/URPh/U<br>RAI/AMCrot |
|----------|---------|----------|-----------------------------------|-----------------------------------|--------------------------|
| Trial 1  | 1267    | 1671     | 427                               | 1330                              | 540                      |
| Trial 2  | 916     | 1441     | 482                               | 1286                              | 475                      |
